# Supplementary material for: Novel polysilsesquioxane hybrid polymer electrolytes for lithium ion batteries
Source: Royal Society of Chemistry journal article supplement (doi:10.1039/c3ta14290f), 2013-11-12
Supplement: c3ta14290f.pdf [file c3ta14290f.pdf]

## Supporting Information

### Novel polysilsesquioxane hybrid polymer electrolytes for lithium ion batteries

Albert Sung Soo Lee<sup>§ab</sup>, Jin Hong Lee<sup>§ac</sup>, Jong-Chan Lee<sup>c</sup>, Soon Man Hong<sup>ab</sup>, Seung Sang Hwang<sup>ab\*</sup>, Chong Min Koo<sup>ab\*</sup>

<sup>a</sup>Center for Materials Architecturing, Korea Institute of Science and Technology, Hwarangno 14-gil 5, Seong-Buk Gu, Seoul 136-791  
; E-mail: koo@kist.re.kr

<sup>b</sup>Nanomaterials Science and Engineering, University of Science and Technology, 217 Gajungro, 176 Gajung-dong, Yuseong-Gu, Daejeon, Korea 305-333

<sup>c</sup>Department of Chemical and Biological Engineering, and Institute of Chemical Process, Seoul National University, 599 Gwanak-ro, Gwanak-gu, Seoul, Republic of Korea, 151-744

#### Supporting Figure S1

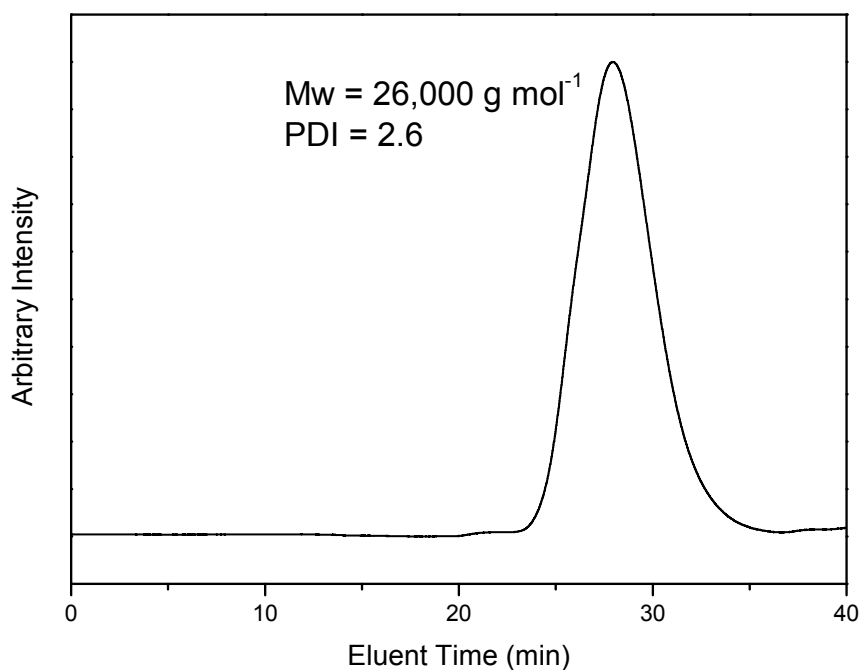

GPC Curve of LPMASQ (THF Eluent, PS Standards)

Supporting Figure S2

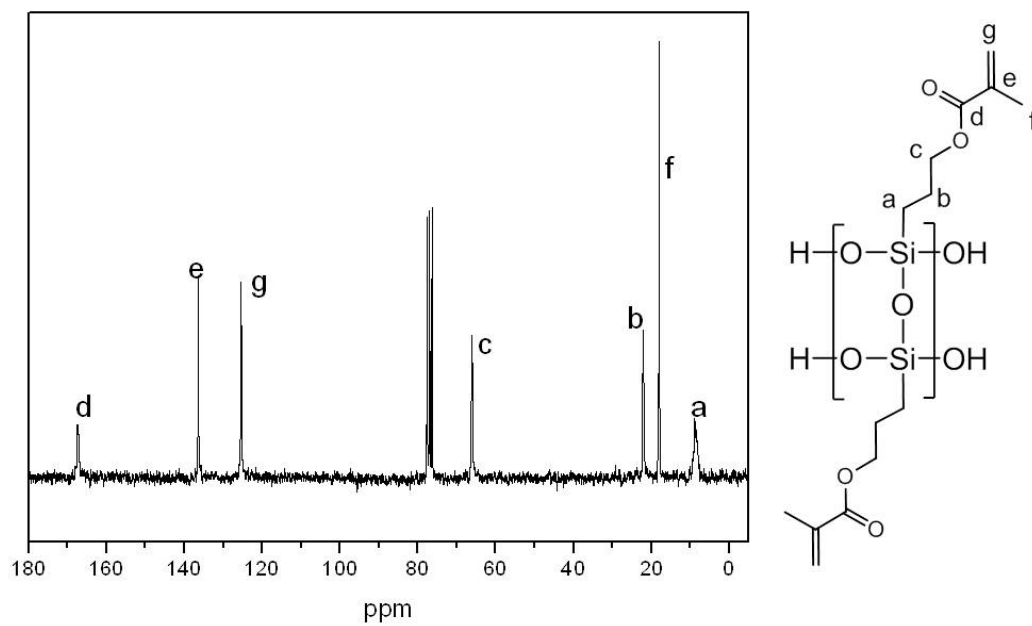

$^{13}\text{C}$  NMR Spectrum of LPMASQ (in  $\text{CDCl}_3$ )

Supporting Figure S3

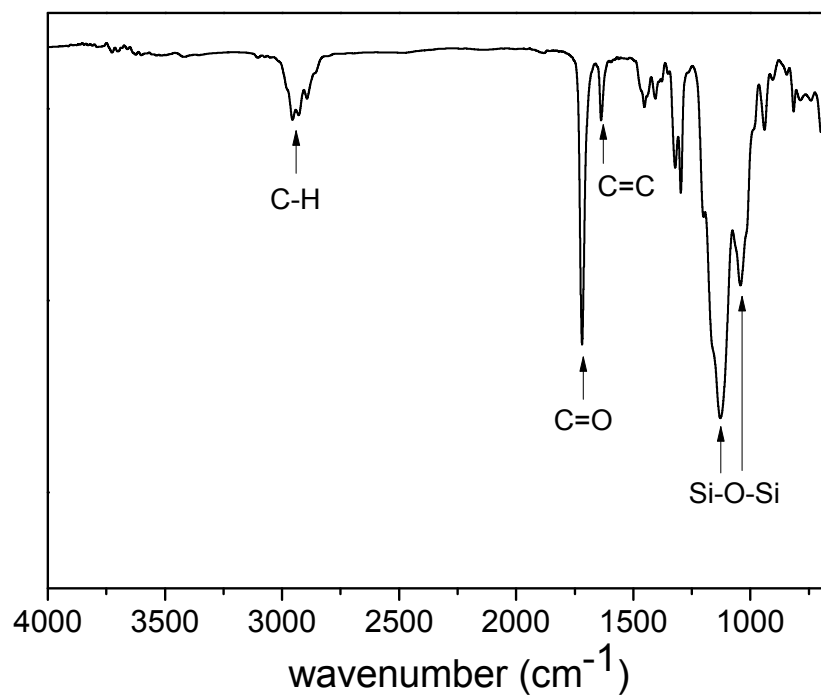

FT-IR Spectrum for LPMASQ

Supporting Figure S4

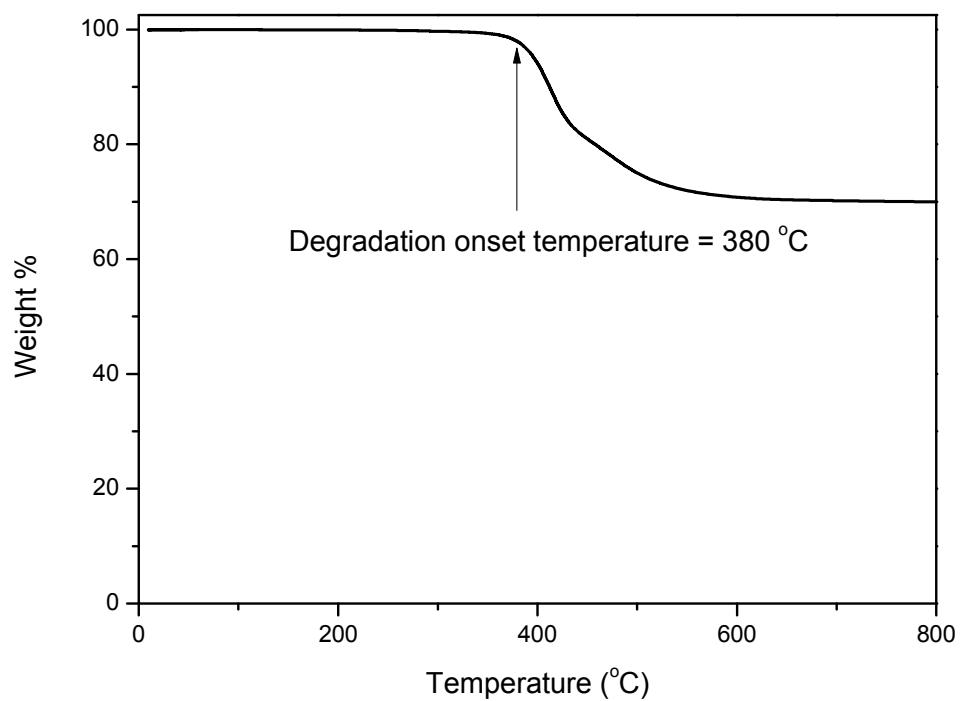

TGA Thermogram of LPMASQ (under N<sub>2</sub>, heating rate= 10 °C/min)

---

Supporting Figure S5

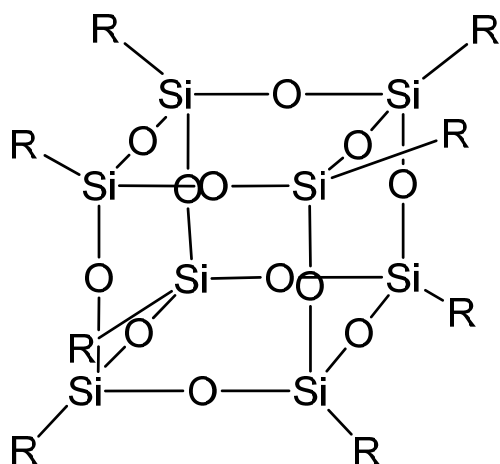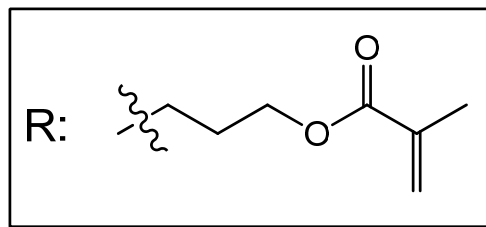

## T8-MMA-POSS

Commercially available T8-Methacrylate-substituted POSS (T8-MMA-POSS) was found to be insoluble in EC/DEC 3/7 (v/v) solution.

Supporting Figure S6

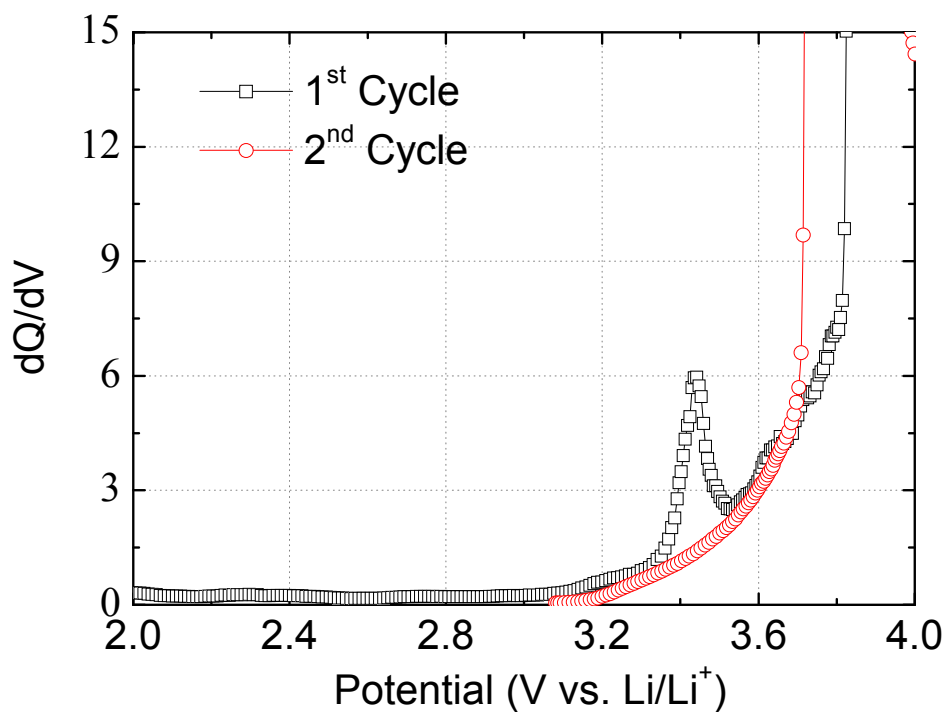

The differential capacity ( $dQ/dV$ ) plot for the cell fabricated with 2 wt % LPMSAQ at 1<sup>st</sup> and 2<sup>nd</sup> cycle, where Q = capacity and V= potential.
